# Supplementary material for: Silver Nanoparticle Effects on Antioxidant Response in Tobacco Are Modulated by Surface Coating
Source: Plants (Basel). 2022 Sep 15;11(18):2402. doi: 10.3390/plants11182402 (PMC9504990; doi:10.3390/plants11182402)
Supplement: Supplementary file 1 [file plants-11-02402-s001.zip › Figure S2. AgNP-CTAB localization.pdf]

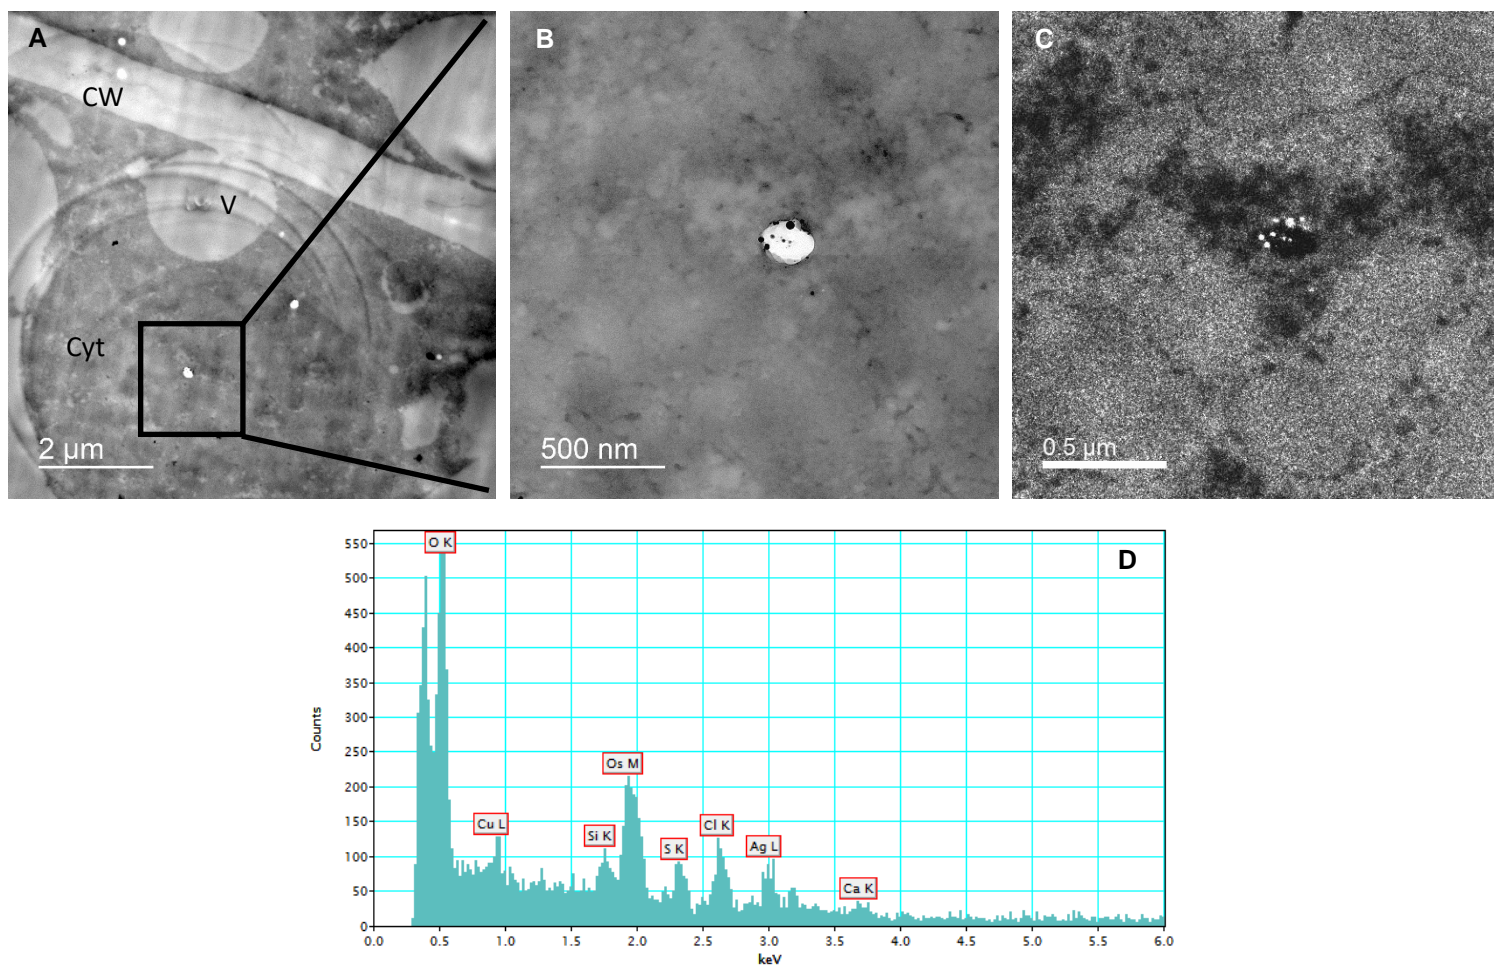

**Figure S2.** AgNP localization in root cells of tobacco plant treated with 100  $\mu\text{M}$  AgNP-CTAB. TEM microphotograph of root cell with AgNPs in the cell cytoplasm (A), enlarged part of cytoplasm with AgNPs (B), silver elemental map (C), and energy-dispersive X-ray spectrum (D). CW - cell wall; Cyt – cytoplasm; V - vacuole
