# Supplementary material for: Silver Nanoparticle Effects on Antioxidant Response in Tobacco Are Modulated by Surface Coating
Source: Plants (Basel). 2022 Sep 15;11(18):2402. doi: 10.3390/plants11182402 (PMC9504990; doi:10.3390/plants11182402)
Supplement: Supplementary file 1 [file plants-11-02402-s001.zip › Table S1. AgNPs.pdf]

**Table S1.** Physico-chemical characteristics of AgNP-PVP and AgNP-CTAB in stock solutions by means of hydrodynamic diameter ( $d_H$ ) in nm obtained from size distributions by volume,  $\zeta$  potential values in mV, surface plasmon resonance (SPR) and percentage of ionic  $Ag^+$ .

| <b>Characteristics</b>           |                | <b>AgNP-PVP</b>   | <b>AgNP-CTAB</b>   |
|----------------------------------|----------------|-------------------|--------------------|
| Size peak I                      | $d_H$ , nm     | $57.65 \pm 16.84$ | $28.19 \pm 10.19$  |
|                                  | mean volume, % | 100%              | 18.1%              |
| Size peak II                     | $d_H$ , nm     |                   | $56.36 \pm 11.56$  |
|                                  | mean volume, % |                   | 23.9%              |
| Size peak III                    | $d_H$ , nm     |                   | $162.25 \pm 86.14$ |
|                                  | mean volume, % |                   | 58.0%              |
| $\zeta$ potential, mV            |                | $-4.24 \pm 2.57$  | $44.67 \pm 3.36$   |
| SPR peak, nm                     |                | 465               | 410                |
| $Ag^+$ , %                       |                | 0.3               | 0.5                |
| Working stock concentrations, mM |                | 10.2              | 10.5               |
